# Supplementary material for: Trends in Oxidative Balance Score and Prevalence of Metabolic Dysfunction-Associated Steatotic Liver Disease in the United States: National Health and Nutrition Examination Survey 2001 to 2018
Source: MDPI journal article supplement (doi:10.3390/nu15234931), 2023-11-27
Supplement: s1 [file s1]

# Trends in Oxidative Balance Score and Prevalence of Metabolic Dysfunction-Associated Steatotic Liver Disease in the United States: National Health and Nutrition Examination Survey 2001 to 2018

Zongbiao Tan <sup>1,†</sup>, Yanrui Wu <sup>1,†</sup>, Yang Meng <sup>2,†</sup>, Chuan Liu <sup>1</sup>, Beiying Deng <sup>1</sup>, Junhai Zhen <sup>3</sup> and Weiguo Dong <sup>1,\*</sup>

<sup>1</sup> Department of Gastroenterology, Renmin Hospital of Wuhan University, 238 Jiefang Road, Wuhan 430060, China

<sup>2</sup> Department of Ophthalmology, Renmin Hospital of Wuhan University, 238 Jiefang Road, Wuhan 430060, China

<sup>3</sup> Department of General Practice, Renmin Hospital of Wuhan University, 238 Jiefang Road, Wuhan 430060, China

\* Correspondence: dongweiguo@whu.edu.cn; Tel.: +86-027-88041911

† These authors contributed equally to this work and share first authorship.

**Table S1.** Components of the oxidative balance score (Zhang et al. (2022) [1]).

| OBS Components                      | Property | Male    |                |          | Female  |               |         |
|-------------------------------------|----------|---------|----------------|----------|---------|---------------|---------|
|                                     |          | 0       | 1              | 2        | 0       | 1             | 2       |
| Dietary OBS components              |          |         |                |          |         |               |         |
| Dietary fiber (g/d)                 | A        | <12.56  | 12.56-19.70    | ≥19.70   | <10.10  | 10.10-16.31   | ≥16.31  |
| Carotene (RE/d)                     | A        | <98.83  | 98.83-306.25   | ≥306.25  | <98.08  | 98.08-383.50  | ≥383.50 |
| Riboflavin (mg/d)                   | A        | <1.79   | 1.79-2.69      | ≥2.69    | <1.34   | 1.34-2.02     | ≥2.02   |
| Niacin (mg/d)                       | A        | <20.65  | 20.65-29.75    | ≥29.75   | <14.52  | 14.52-21.86   | ≥21.86  |
| Vitamin B <sub>6</sub> (mg/d)       | A        | <1.59   | 1.59-2.40      | ≥2.40    | <1.13   | 1.13-1.77     | ≥1.77   |
| Total folate (mcg/d)                | A        | <316.00 | 316.00-492.00  | ≥492.00  | <251.00 | 251.00-388.96 | ≥388.96 |
| Vitamin B <sub>12</sub> (mcg/d)     | A        | <3.36   | 3.36-6.20      | ≥6.20    | <2.22   | 2.22-4.22     | ≥4.22   |
| Vitamin C (mg/d)                    | A        | <42.44  | 42.44-113.21   | ≥113.21  | <38.01  | 38.01-98.49   | ≥98.49  |
| Vitamin E (ATE) (mg/d)              | A        | <5.82   | 5.82-9.42      | ≥9.42    | <4.53   | 4.53-7.52     | ≥7.52   |
| Calcium (mg/d)                      | A        | <646.00 | 646.00-1072.00 | ≥1072.00 | <499.24 | 499.24-849.00 | ≥849.00 |
| Magnesium (mg/d)                    | A        | <257.00 | 257.00-361.28  | ≥361.28  | <187.00 | 187.00-283.43 | ≥283.43 |
| Zinc (mg/d)                         | A        | <9.75   | 9.75-15.10     | ≥15.10   | <6.73   | 6.73-10.75    | ≥10.75  |
| Copper (mg/d)                       | A        | <1.12   | 1.12-1.57      | ≥1.57    | <0.85   | 0.85-1.28     | ≥1.28   |
| Selenium (mcg/d)                    | A        | <94.94  | 94.94-141.80   | ≥141.80  | <67.79  | 67.79-99.50   | ≥99.50  |
| Total fat (g/d)                     | P        | ≥69.83  | 69.83-107.43   | <107.43  | ≥50.98  | 50.98-75.79   | <75.79  |
| Iron (mg/d)                         | P        | ≥12.88  | 12.88-19.17    | <19.17   | ≥9.65   | 9.65-14.32    | <14.32  |
| Lifestyle OBS components            |          |         |                |          |         |               |         |
| Physical activity (MET-minute/week) | A        | <417.86 | 417.86-1135.71 | ≥1135.71 | <270.00 | 270.00-845.71 | ≥845.71 |
| Alcohol (g/d)                       | P        | ≥30     | 0-30           | None     | ≥15     | 0-15          | None    |
| Body mass index (kg/m²)             | P        | ≥25.54  | 25.54-29.17    | <29.17   | ≥23.74  | 23.74-28.64   | <28.64  |
| Cotinine (ng/mL)                    | P        | ≥0.038  | 0.038-1.13     | <1.13    | ≥0.035  | 0.035-0.172   | <0.172  |

OBS: oxidative balance score; A: antioxidant; P: prooxidant; RE: retinol equivalent; ATE: alpha-tocopherol equivalent; MET: metabolic equivalent.

---

## Reference

1. Zhang, W.; Peng, S.F.; Chen, L.; Chen, H.M.; Cheng, X.E.; Tang, Y.H. Association between the Oxidative Balance Score and Telomere Length from the National Health and Nutrition Examination Survey 1999–2002. *Oxidative Med. Cell. Longev.* **2022**, 2022, 1345071. <https://doi.org/10.1155/2022/1345071>.

**Disclaimer/Publisher's Note:** The statements, opinions and data contained in all publications are solely those of the individual author(s) and contributor(s) and not of MDPI and/or the editor(s). MDPI and/or the editor(s) disclaim responsibility for any injury to people or property resulting from any ideas, methods, instructions or products referred to in the content.
